# Supplementary material for: Synthesis and formation mechanism of self-assembled 3D flower-like Bi/γ-Fe2O3 composite particles
Source: Royal Society of Chemistry journal article supplement (doi:10.1039/c9ce00326f), 2019-01-01
Supplement: c9ce00326f1.pdf [file c9ce00326f1.pdf]

***Electronic Supplementary Information (ESI)***

**Synthesis and Formation Mechanism of Self-assembled  
3D Flowerlike Bi/ $\gamma$ -Fe<sub>2</sub>O<sub>3</sub> Composite Particles**

Yunpeng Liu <sup>ab</sup>, Lixiong Qian <sup>ab</sup>, Xiaoyi Zhao <sup>ab</sup>, Jiayi Wang <sup>ab</sup>, Lei Yao <sup>b</sup>,  
Xueqing Xing <sup>b</sup>, Guang Mo <sup>b</sup>, Quan Cai <sup>b</sup>, Zhongjun Chen<sup>b</sup>, Zhonghua Wu <sup>\*, ab</sup>

<sup>a</sup>Institute of High Energy Physics, Chinese Academy of Sciences,  
Beijing 100049, China

<sup>b</sup>University of Chinese Academy of Sciences, Chinese Academy of Sciences,  
Beijing 100049, China

**\*: Correspondence to:** Zhonghua Wu, E-mail: [wuzh@ihep.ac.cn](mailto:wuzh@ihep.ac.cn)

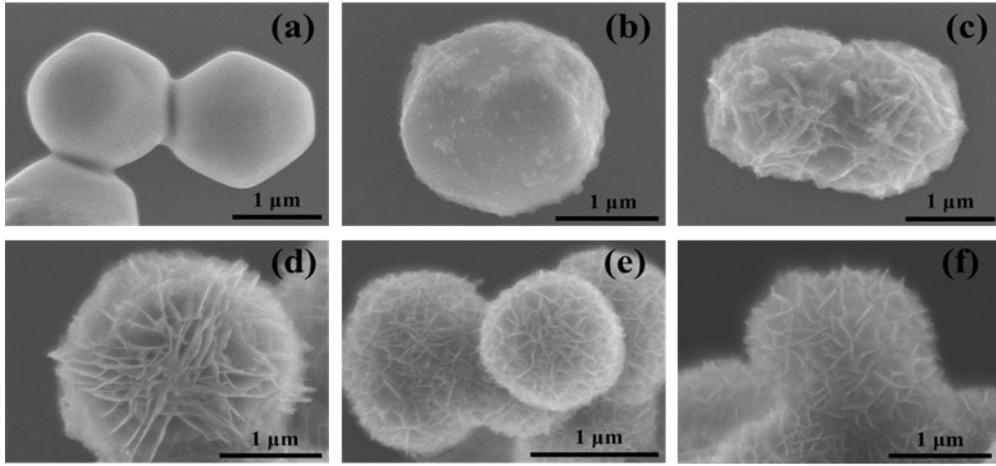

**Figure S1.** SEM images of the hydrothermal synthesized samples. The initial content of  $\text{Bi}(\text{NO}_3)_3$  is 4 mmol. The mole ratio of the starting materials  $\text{Bi}(\text{NO}_3)_3$  and  $\text{Fe}(\text{NO}_3)_3$  are 4:0 (a), 4:1 (b), 4:2 (c), 4:3 (d), 4:4 (e), and 4:5 (f).

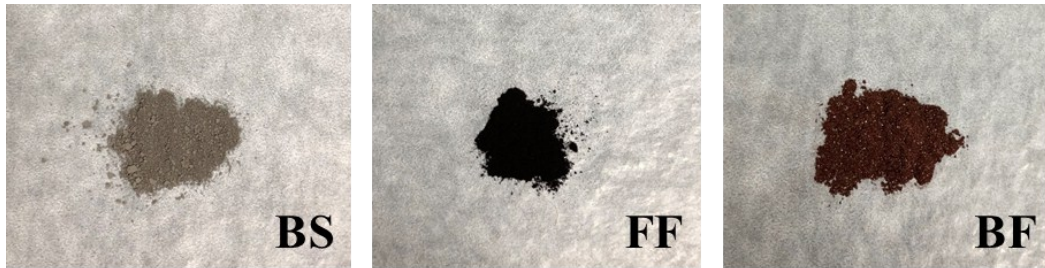

**Figure S2.** Hydrothermal synthesized BS, FF, and BF samples. The as-prepared BS, FF, and BF are, respectively, earthy-yellow, black, and reddish-brown. From the colors, it can be judged that FF sample is  $\text{Fe}_3\text{O}_4$ , while BF sample is  $\gamma\text{-Fe}_2\text{O}_3$ .

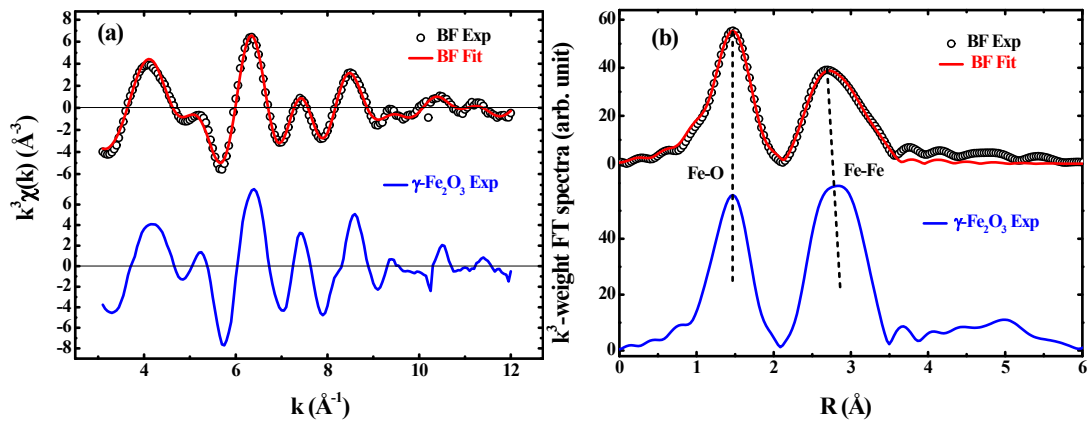

**Figure S3.** Fe K-edge EXAFS oscillations  $k^3\chi(k)$  (a) and the corresponding FT spectra (b) of  $\gamma\text{-Fe}_2\text{O}_3$  and sample BF.

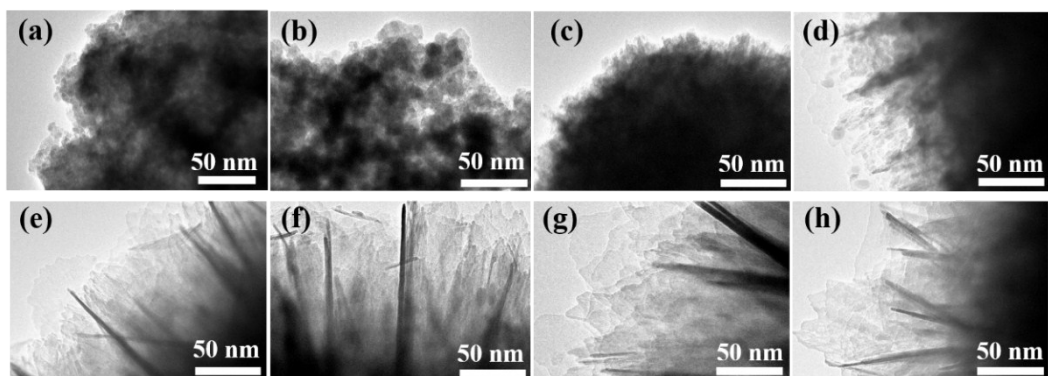

**Figure S4.** TEM images of time-dependent hydrothermally intermediate products. (a) BF-30min, (b) BF-45min, (c) BF-1h, (d) BF-2h, (e) BF-4h, (f) BF-8h, (g) BF-12h, and (h) BF-24h.

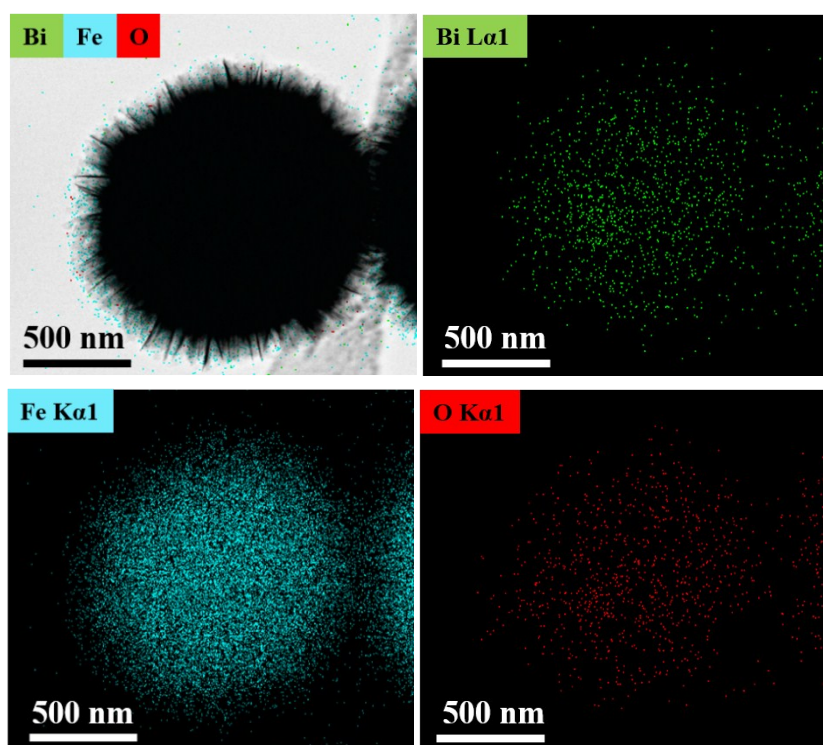

**Figure S5.** The element mapping of BF particle.

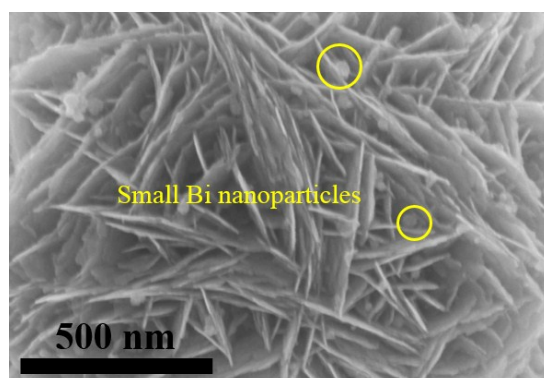

**Figure S6.** Surface enlarged SEM image of BF particle.

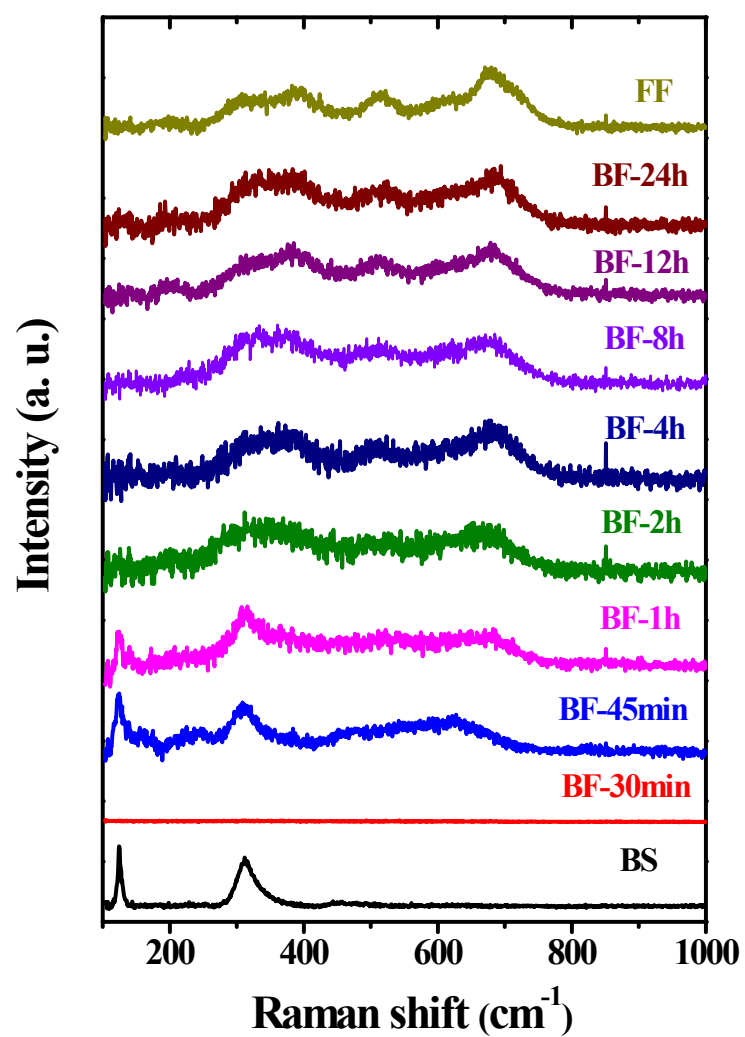

**Figure S7.** Raman spectra of time-dependent intermediate products during the hydrothermal synthesis process.
